# Supplementary material for: Assessment of Health Risks in Wheat Crop Irrigated by Manka Canal, Dera Ghazi Khan, Pakistan
Source: Hindawi journal article supplement (doi:10.1155/2023/1097072), 2023-12-21
Supplement: f1 [file 1097072.f1.pdf]

| Soil | Cu     | Zn       | Fe     | Mn       | Cd      | Ni      | Pb       |
|------|--------|----------|--------|----------|---------|---------|----------|
| R4   | 4.26   | 3.63     | 10.83  | 8.81     | 0.00    | 31.97   | 7.39     |
| R5   | 3.34   | 5.85     | 11.33  | 9.98     | 3.89    | 39.07   | 10.62    |
| R6   | 3.97   | 5.35     | 9.45   | 11.67    | 5.00    | 32.75   | 4.91     |
| S1   | 3.04   | 6.20     | 10.54  | 9.92     | 2.11    | 20.98   | 1.70     |
| S2   | 1.78   | 3.10     | 10.16  | 8.92     | 1.55    | 6.66    | 7.69     |
| S3   | 3.30   | 9.13     | 9.90   | 10.19    | 3.22    | 15.76   | 6.00     |
| S4   | 2.83   | 19.75    | 11.27  | 8.58     | 4.22    | 15.10   | 90.40    |
| S5   | 3.77   | 16.25    | 10.73  | 8.31     | 3.77    | 21.65   | 4.63     |
| S6   | 4.93   | 11.25    | 11.23  | 8.59     | 0.33    | 10.45   | 3.96     |
| S7   | 2.09   | 9.15     | 10.48  | 9.96     | 0.67    | 9.32    | 7.63     |
| S8   | 4.71   | 16.45    | 11.02  | 10.33    | 1.44    | 2.55    | 5.88     |
| S9   | 3.90   | 3.13     | 9.70   | 9.00     | 1.67    | 34.97   | 9.72     |
| S10  | 3.57   | 6.13     | 12.10  | 8.65     | 2.33    | 34.97   | 12.25    |
| S11  | 4.86   | 5.28     | 11.92  | 9.96     | 1.78    | 28.97   | 65.54    |
| S12  | 1.77   | 4.95     | 8.95   | 9.58     | 1.00    | 2.44    | 21.24    |
| S13  | 3.43   | 6.13     | 10.38  | 8.59     | 1.89    | 1.00    | 14.46    |
| S14  | 3.37   | 5.85     | 7.92   | 16.25    | 0.11    | 0.78    | 9.72     |
| S15  | 2.07   | 2.75     | 9.07   | 9.50     | 3.11    | 0.33    | 23.28    |
| S16  | 4.64   | 4.10     | 9.07   | 9.60     | 3.66    | 11.10   | 50.62    |
| S17  | 3.90   | 3.38     | 11.92  | 8.29     | 3.33    | 3.00    | 7.63     |
| S18  | 3.17   | 7.53     | 8.95   | 9.65     | 0.44    | 5.33    | 15.03    |
| S19  | 4.93   | 3.08     | 11.17  | 9.98     | 1.44    | 3.33    | 6.34     |
| S20  | 2.57   | 7.53     | 9.05   | 8.59     | 0.33    | 7.88    | 6.22     |
| S21  | 4.19   | 6.13     | 10.20  | 10.19    | 2.22    | 16.10   | 3.33     |
| S22  | 3.84   | 3.10     | 7.30   | 9.58     | 2.33    | 4.55    | 21.24    |
| S23  | 3.49   | 5.55     | 9.07   | 8.69     | 3.22    | 8.21    | 5.79     |
| S24  | 1.77   | 3.10     | 11.83  | 9.69     | 1.11    | 5.44    | 3.58     |
| S25  | 3.94   | 5.90     | 9.07   | 8.58     | 1.55    | 10.77   | 5.21     |
|      | 3.43   | 6.99     | 10.12  | 9.57     | 1.95    | 11.27   | 16.36    |
|      | 1.0094 | 4.544194 | 1.2898 | 1.541151 | 1.17864 | 10.1614 | 21.41282 |

| Water | Cu       | Zn      | Fe       | Mn       | Cd       | Ni       | Pb       |
|-------|----------|---------|----------|----------|----------|----------|----------|
| R1    | 8.514286 | 7.25    | 45.5     | 19       |          | 0.04     | 0.01     |
| R2    | 6.685714 | 15      | 47.58333 | 19       |          |          | 0.04     |
| R3    | 7.942857 | 10      | 0.51     | 19.00    |          |          | 0.01     |
| IW1   | 6.085714 | 34      | 44.25    | 19.00    | 0.04     | 0.912    | 0.99     |
| IW2   | 3.557143 | 33      | 42.67    | 19.00    | 0.035    | 0.912    | 0.99     |
| IW3   | 6.6      | 18.25   | 41.58    | 20.00    | 0.045    | 0.912    | 0.912    |
| IW4   | 5.657143 | 39.5    | 47.33333 | 20.6     | 0.049    | 0.856    | 0.987    |
| IW5   | 7.542857 | 32.5    | 45.08    | 19.95    | 0.043    | 0.999    | 0.912    |
| IW6   | 9.857143 | 34.8    | 47.17    | 20.63    | 0.03     | 0.827    | 0.912    |
| IW7   | 4.171429 | 39      | 44.00    | 19.00    | 0.04     | 0.827    | 0.99     |
| IW8   | 9.428571 | 32.9    | 46.29167 | 20       | 0.023    | 0.912    | 1.33     |
| IW9   | 7.8      | 34      | 40.75    | 21.6     | 0.047    | 0.987    | 1.33     |
| IW10  | 7.142857 | 35      | 50.83333 | 20.75    | 0.044    | 0.912    | 0.912    |
| IW11  | 9.714286 | 33      | 50.08333 | 19       | 0.042    | 0.912    | 0.987    |
| IW12  | 3.542857 | 33      | 37.58    | 23.00    | 0.013    | 0.99     | 0.912    |
| IW13  | 6.857143 | 34.9    | 43.58    | 20.62    | 0.05     | 0.98     | 0.912    |
| IW14  | 6.742857 | 36      | 33.25    | 19.00    | 0.04     | 0.912    | 0.99     |
| IW15  | 4.142857 | 38      | 38.08    | 22.80    | 0.045    | 0.869    | 0.99     |
| IW16  | 9.285714 | 33      | 38.08333 | 19       | 0.046    | 0.883    | 0.99     |
| IW17  | 7.8      | 38      | 50.08    | 19.90    | 0.045    | 0.856    | 1.02     |
| IW18  | 6.342857 | 32      | 37.58    | 19.00    | 0.029    | 0.823    | 0.987    |
| IW19  | 7        | 35      | 46.92    | 19.00    | 0.043    | 0.827    | 0.912    |
| IW20  | 5.142857 | 37      | 38       | 20.615   | 0.04     | 0.999    | 0.912    |
| IW21  | 8.371429 | 38      | 42.83333 | 20       | 0.045    | 0.912    | 0.99     |
| IW22  | 7.685714 | 37      | 30.66667 | 19       | 0.041    | 0.897    | 0.987    |
| IW23  | 3        | 35      | 38.08333 | 20.85    |          | 0.856    | 0.912    |
| IW24  | 3.542857 | 36      | 49.66667 | 19       |          | 0.999    | 0.912    |
| IW25  | 3        | 34      | 38.08333 | 16       |          | 0.97     | 0.99     |
|       | 6.400571 | 34.514  | 42.50167 | 19.8922  | 0.039773 | 0.90964  | 0.98672  |
|       | 2.163175 | 4.01361 | 5.41702  | 1.412947 | 0.008912 | 0.059225 | 0.110436 |

| Wheat samp | Pb       | Ni       | Cd       | Mn       | Fe       | Zn       | Cu       |
|------------|----------|----------|----------|----------|----------|----------|----------|
| R7         | 1.9      | 7.4      | 2.9      | 42.3     | 54.6     | 14.5     | 29.8     |
| R8         | 0.9      | 4.9      | 1        | 47.9     | 57.1     | 23.4     | 23.4     |
| R9         | 1.05     | 9.7      | 1.4      | 56       | 0.614    | 21.4     | 27.8     |
| W 1        | 4.025    | 24.5     | 1.9      | 47.6     | 53.1     | 24.8     | 21.3     |
| W 2        | 3.4      | 5        | 0.2      | 42.8     | 51.2     | 12.4     | 12.45    |
| W 3        | 13.925   | 13.5     | 2.8      | 48.9     | 49.9     | 36.5     | 23.1     |
| W 4        | 0.375    | 18.9     | 1.9      | 41.2     | 56.8     | 79       | 19.8     |
| W 5        | 10.55    | 6        | 1.4      | 39.9     | 54.1     | 65       | 26.4     |
| W 6        | 13.275   | 14.2     | 2.9      | 41.25    | 56.6     | 45       | 34.5     |
| W 7        | 20       | 13.6     | 3.8      | 47.8     | 52.8     | 36.6     | 14.6     |
| W 8        | 1.025    | 19.5     | 3.4      | 49.6     | 55.55    | 65.8     | 33       |
| W 9        | 6.85     | 91.4     | 0.3      | 43.2     | 48.9     | 12.5     | 27.3     |
| W 10       | 12.75    | 8.4      | 0.6      | 41.5     | 61       | 24.5     | 25       |
| W 11       | 5.725    | 2.3      | 1.3      | 47.8     | 60.1     | 21.1     | 34       |
| W 12       | 19.85    | 31.5     | 1.5      | 46       | 45.1     | 19.8     | 12.4     |
| W 13       | 2.575    | 31.5     | 2.1      | 41.23    | 52.3     | 24.5     | 24       |
| W 14       | 2        | 26.1     | 1.6      | 78       | 39.9     | 23.4     | 23.6     |
| W 15       | 4.7      | 2.2      | 0.9      | 45.6     | 45.7     | 11       | 14.5     |
| W 16       | 3.2      | 0.9      | 1.7      | 46.1     | 45.7     | 16.4     | 32.5     |
| W 17       | 2.15     | 0.7      | 0.1      | 39.8     | 60.1     | 13.5     | 27.3     |
| W 18       | 5.15     | 0.3      | 2.8      | 46.3     | 45.1     | 30.1     | 22.2     |
| W 19       | 1.2      | 10       | 3.3      | 47.89    | 56.3     | 12.3     | 34.5     |
| W 20       | 2.175    | 2.7      | 3        | 41.23    | 45.6     | 30.1     | 18       |
| W 21       | 2.7      | 4.8      | 0.4      | 48.9     | 51.4     | 24.5     | 29.3     |
| W 22       | 13.35    | 13.583   | 4.98     | 46       | 36.8     | 12.4     | 26.9     |
| W 23       | 5.8      | 7.1      | 0.3      | 41.7     | 45.7     | 22.2     | 24.4     |
| W 24       | 2.95     | 14.5     | 2        | 46.5     | 59.6     | 12.4     | 12.4     |
| W 25       | 4.7      | 4.1      | 2.1      | 41.2     | 45.7     | 23.6     | 27.6     |
|            | 6.576    | 14.69132 | 1.8912   | 45.92    | 51.002   | 27.976   | 24.042   |
|            | 5.758311 | 18.55817 | 1.263501 | 7.397523 | 6.500424 | 18.17678 | 7.065581 |
